# Supplementary material for: Synchronous inhibition of mTOR and VEGF/NRP1 axis impedes tumor growth and metastasis in renal cancer
Source: PubMed Central journal article supplement (PMC6895165; doi:10.1038/s41698-019-0105-2), 2019-12-05
Supplement: 41698_2019_105_MOESM1_ESM.pdf [file 41698_2019_105_MOESM1_ESM.pdf]

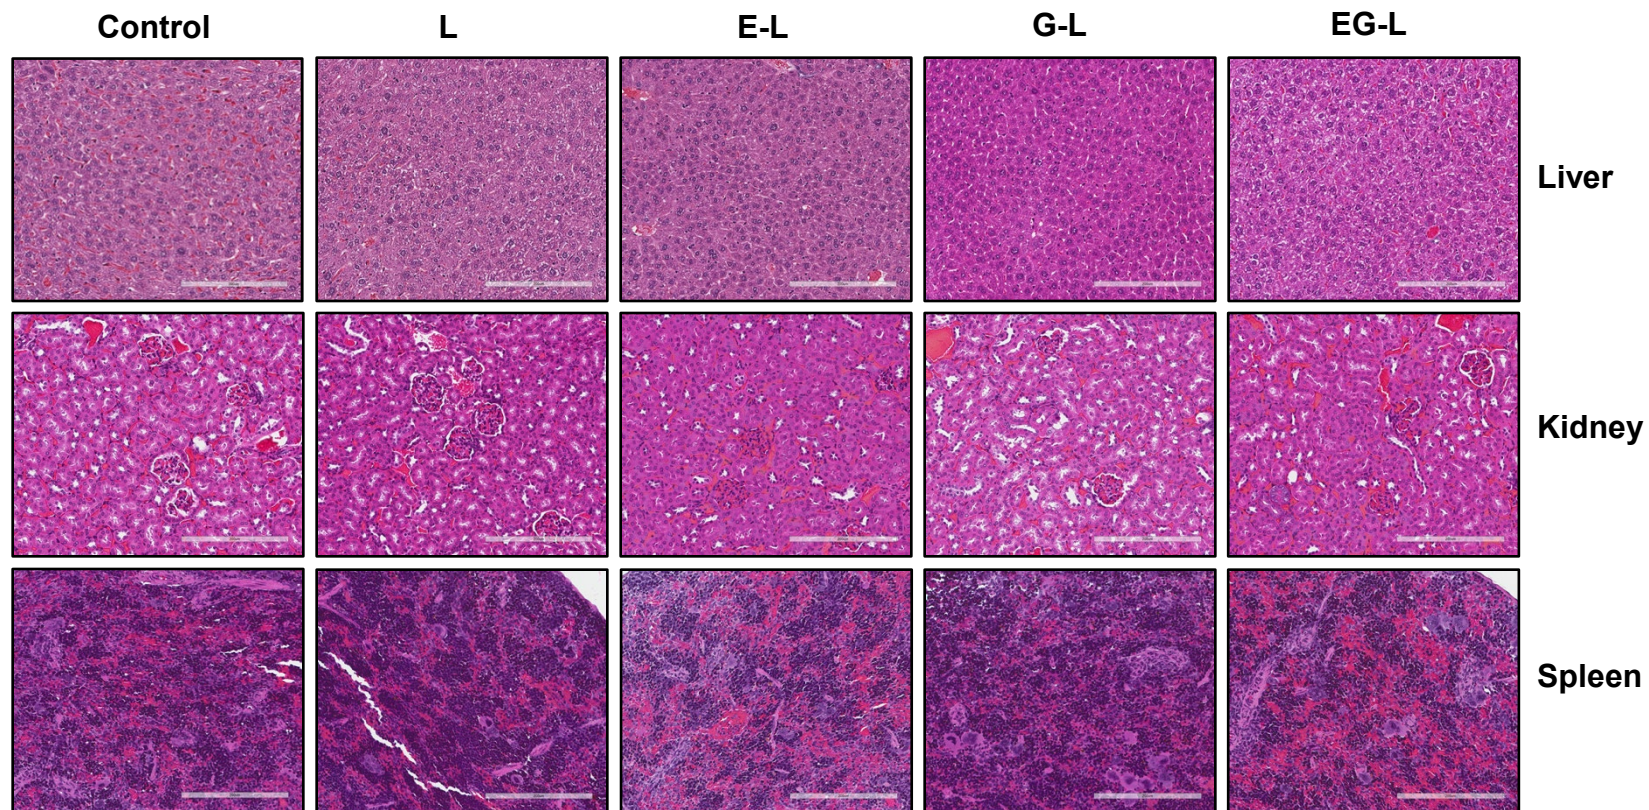

**Supplementary Figure S1: H&E staining of liver, kidney and spleen collected from mice bearing 786-O xenografts.** No significant morphological changes were observed due to treatment. Bar length = 200  $\mu$ m.

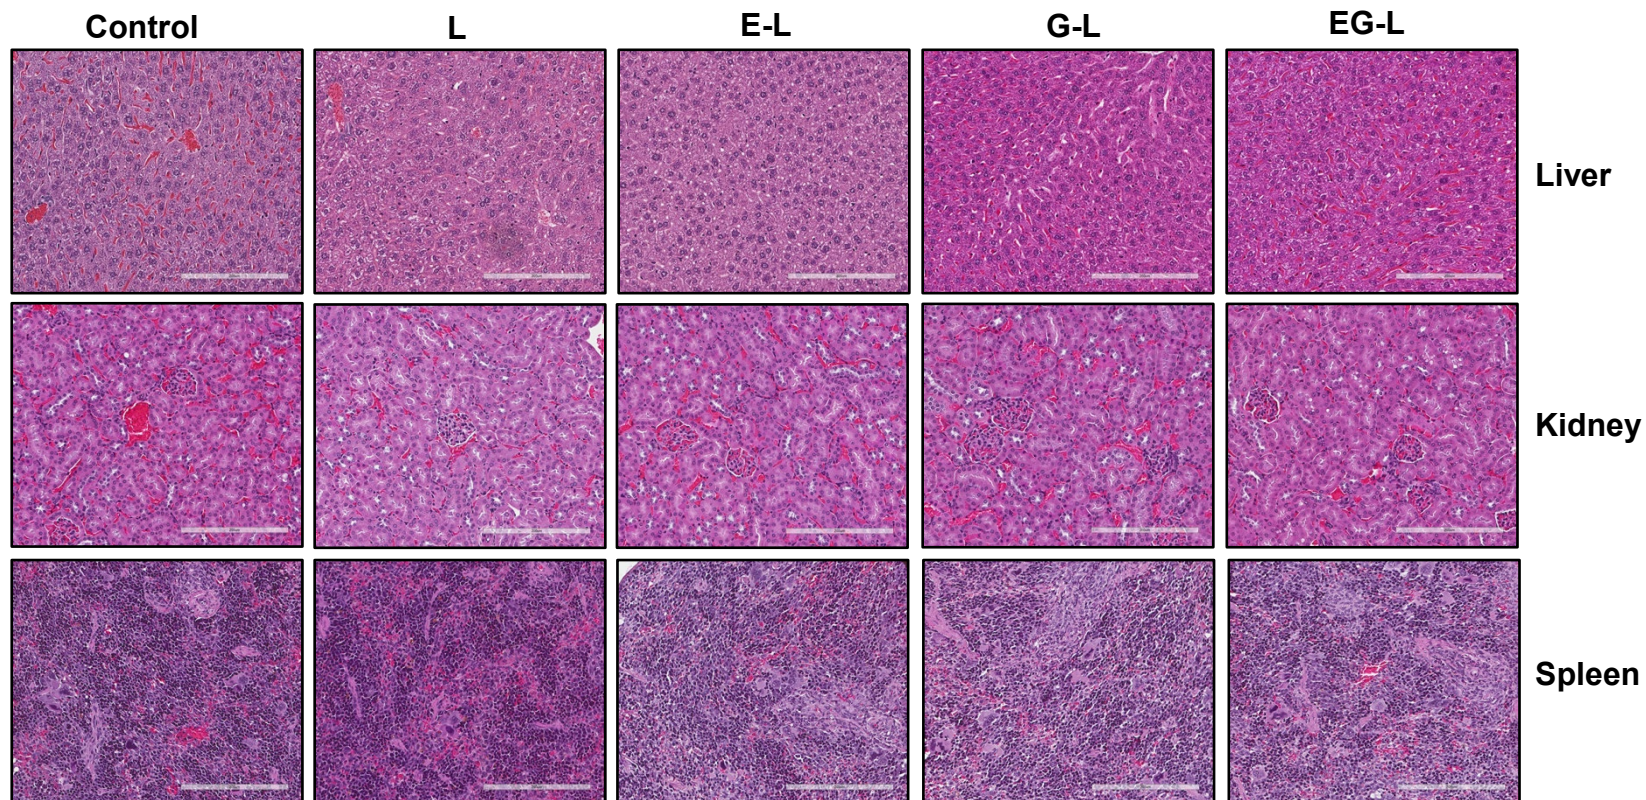

**Supplementary Figure S2: H&E staining of liver, kidney and spleen collected from mice bearing A498 xenografts.** No significant morphological changes were observed due to treatment. Bar length = 200  $\mu$ m.

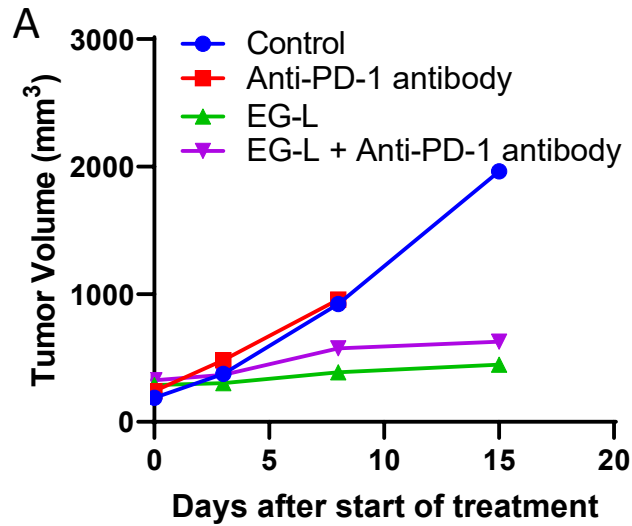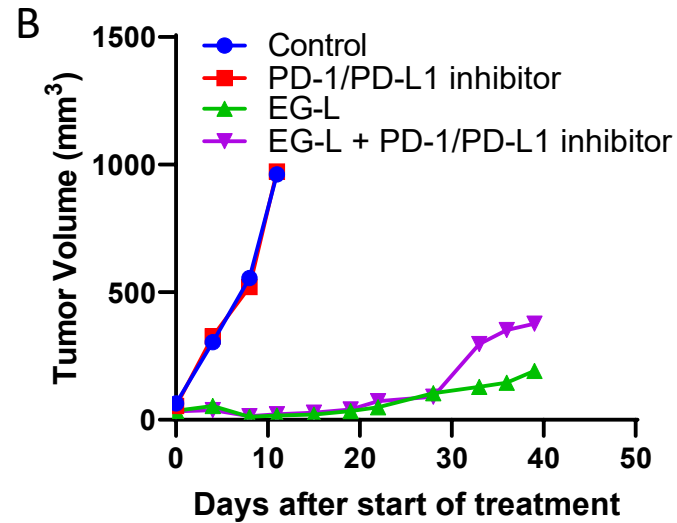

**Supplementary Figure S3: Single mouse trial demonstrating the anti-PD-1 therapy resistance of Renca mouse model used in this study.** Both anti-PD-1 antibody and PD-1/PD-L1 small molecule inhibitor did not show any tumor growth inhibitory effect. EG-L did not show any additive or synergistic effect when combined with anti-PD-1 therapy either. In fact, anti-PD-1 therapy seemed to exert slight antagonistic effect to EG-L treatment in the long run. (n= 1 mouse per treatment group)

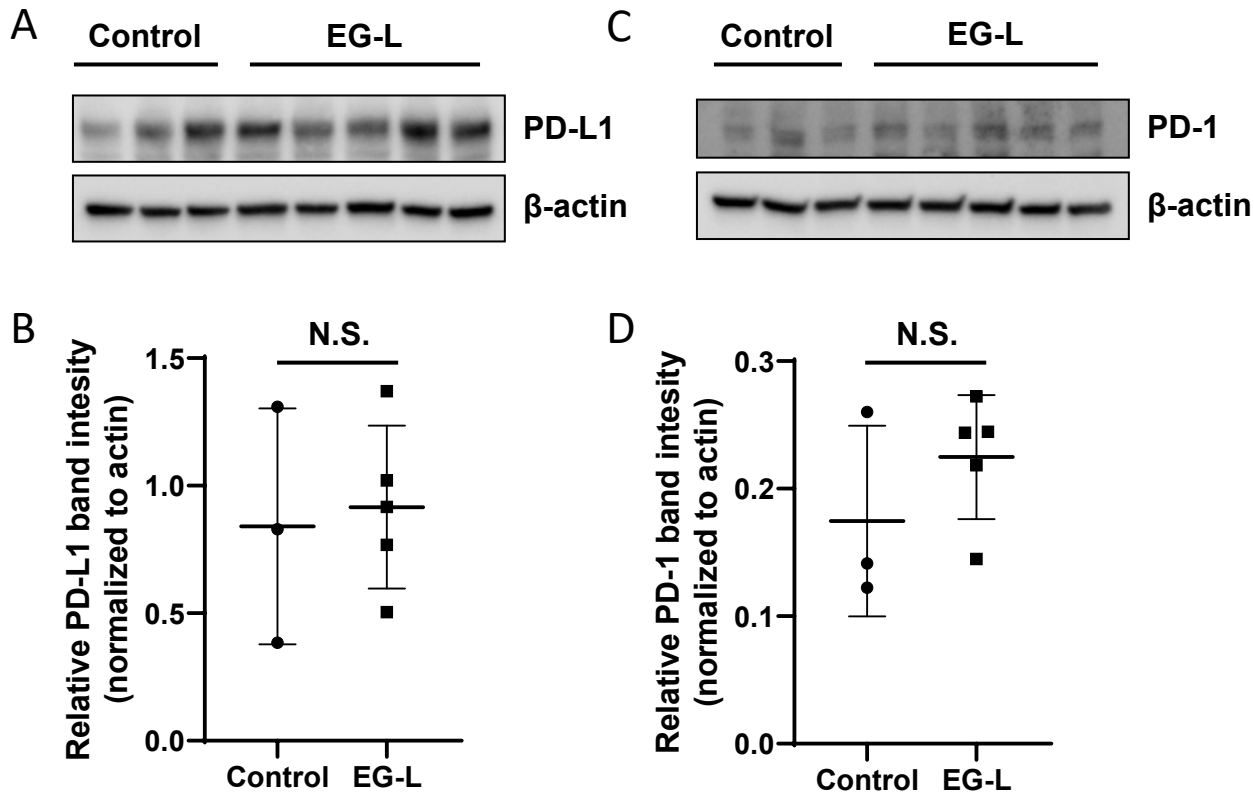

**Supplementary Figure S4: Effect of EG-L treatment on the expression of PD-1 in Renca tumors.** EG-L treatment did not significantly change PD-L1 (A,B) or PD-1 (C,D) expression in the Renca tumors compared to the vehicle treated tumors. N.S. means not significant. (n = 3 tumors for control and 5 tumors for EG-L)

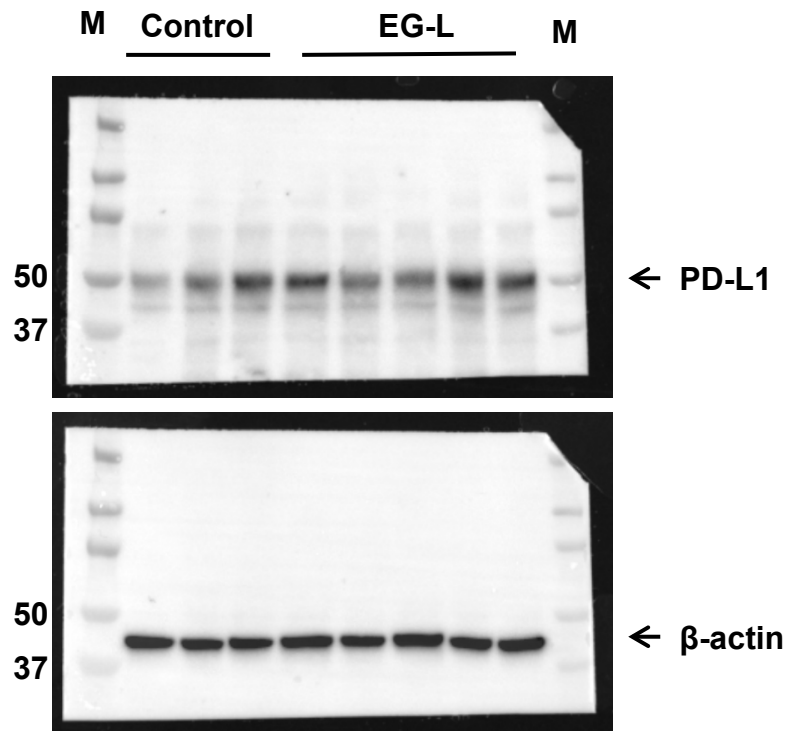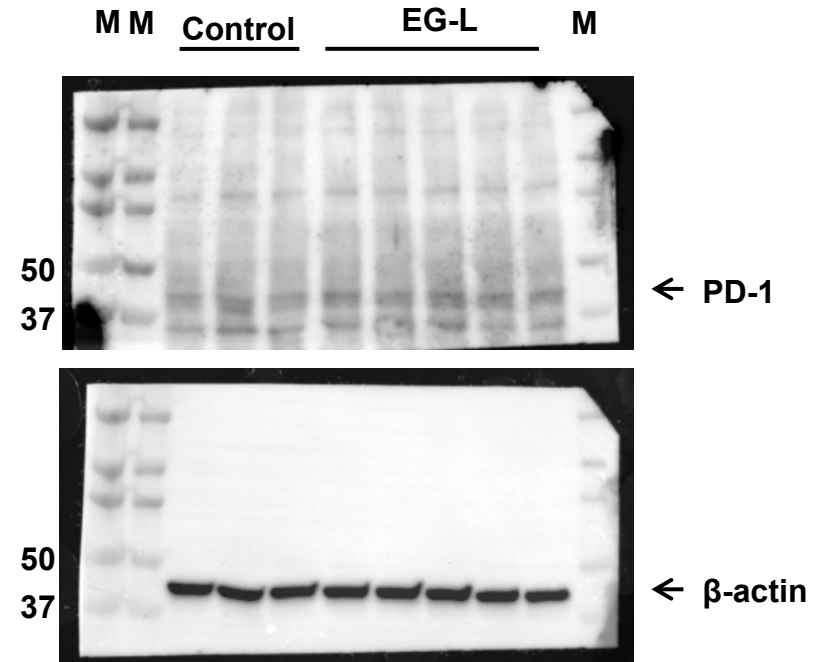

**Supplementary Figure S5: Uncropped blots showing the bands of the respective target proteins used in Figure S4.**  
The merged images show the bands along with the markers (M).

| Target     | Forward Primer              | Reverse Primer              |
|------------|-----------------------------|-----------------------------|
| CXCL9 (m)  | 5'-TGTGGCTGTAGCTTAGTGGC-3'  | 5'-GCCAATGCCTGGTGTGTAAC-3'  |
| CXCL10 (m) | 5'-ATGACGGGCCAGTGAGAATG-3'  | 5'-CTCCCCAGACCACCATTTC-3'   |
| CXCL11 (m) | 5'-AGCCACCCAAAGCTAGGAAC-3'  | 5'-CCTGCCTCCCTCACATAACC-3'  |
| TGFB1 (m)  | 5'-TCCTAACCCAGAGGTGGAC-3'   | 5'-CCGAAATTCTGCGTCTGCTG-3'  |
| ACTB (m)   | 5'-GGCACCACACCTTCTACAATG-3' | 5'-GGGGTGTTGAAGGTCTCAAAC-3' |

**Supplementary Table S1: Primer Sequences used in this study.**
